# Supplementary material for: Tyrosine-610 in the Receptor Kinase BAK1 Does Not Play a Major Role in Brassinosteroid Signaling or Innate Immunity
Source: Front Plant Sci. 2017 Aug 2;8:1273. doi: 10.3389/fpls.2017.01273 (PMC5539094; doi:10.3389/fpls.2017.01273)
Supplement: Supplementary file 1 [file Table_1.XLSX]

## Sheet: Sheet1
Supplemental Table 1. List of genes up-regulated in BAK1(Y610F)-Flag relative to BAK1-Flag plants. The FC (BAK1/Y610F) reports the linear fold-change calculation of control/mutant. The log₂ FC (BAK1/Y610F) is the logged FC value with base 2.
GenBank Accession	Gene Locus ID	Gene Description	RP/Rsum	FC (BAK1/Y610F)	Adjusted p-value (FDR correction)	P-value	log₂ FC (BAK1/Y610F)
NM_118994	AT4G28520	cruciferin 3 (CRU3)	29.92	0.2386	5.499e-06	3.272e-10	-2.06733
NM_180796	AT5G44120	cruciferin A (ATCRA1, CRA1, CRU1)	28.9	0.2674	9.366e-06	2.787e-10	-1.90293
NM_101421	AT1G15520	ATP-binding cassette G40 (ABCG40, PDR12)	221	0.2825	0.002522	1.651e-06	-1.82368
TA27245_3702	N/A	N/A	38.26	0.285	1.128e-05	1.007e-09	-1.81097
NM_001161277	AT5G35660	Glycine-rich protein family	41.72	0.3183	1.25e-05	1.488e-09	-1.65154
BP643432	N/A	N/A	59.72	0.3347	4.893e-05	7.28e-09	-1.57906
NM_180797	AT5G44120	cruciferin A (ATCRA1, CRA1, CRU1)	78.81	0.4098	0.0001352	2.414e-08	-1.28701
NM_117319	AT4G12490	Bifunctional inhibitor/lipid-transfer protein/seed storage 2S albumin superfamily protein	105.2	0.4298	0.0003052	8.173e-08	-1.21826
TA28590_3702	N/A	N/A	101.2	0.4449	0.0002922	6.954e-08	-1.16845
NM_118748	AT4G26150	cytokinin-responsive gata factor 1 (CGA1)	96.61	0.4502	0.0002749	5.727e-08	-1.15136
NM_202021	AT1G03106	hypothetical protein	141.6	0.4693	0.0007211	2.789e-07	-1.09142
NM_124448	AT5G50600	hydroxysteroid dehydrogenase 1 (HSD1)	118.1	0.473	0.0004457	1.326e-07	-1.08009
NM_118755	AT4G26220	caffeoyl coenzyme A ester O-methyltransferase 7 (CCOAOMT7)	126.7	0.479	0.0005409	1.77e-07	-1.0619
NM_126581	AT2G05580	Glycine-rich protein family	129.8	0.4872	0.0005483	1.958e-07	-1.03741
AK227000	N/A	N/A	192.3	0.4956	0.001527	9.54e-07	-1.01275
NM_104226	AT1G53480	mto 1 responding down 1 (MRD1)	182.4	0.5157	0.001302	7.748e-07	-0.955396
NM_118749	AT4G26160	atypical CYS HIS rich thioredoxin 1 (ACHT1)	153.7	0.5244	0.0008735	3.899e-07	-0.93126
NM_118746	AT4G26130	cotton fiber protein	151.9	0.5248	0.000892	3.716e-07	-0.93016
NM_118756	AT4G26230	Ribosomal protein L31e family protein	165.8	0.5336	0.00111	5.285e-07	-0.906169
NM_118752	AT4G26190	Haloacid dehalogenase-like hydrolase (HAD) superfamily protein	166.6	0.5374	0.001065	5.388e-07	-0.895932
NM_118747	AT4G26140	beta-galactosidase 12 (BGAL12)	174.6	0.5394	0.00115	6.5e-07	-0.890573
NM_001202799	AT2G41640	Glycosyltransferase family 61 protein	174.1	0.543	0.001202	6.435e-07	-0.880976
NM_001203509	AT5G39160	RmlC-like cupins superfamily protein	264	0.5766	0.004612	3.294e-06	-0.794357
NM_118754	AT4G26210	Mitochondrial ATP synthase subunit G protein	229.1	0.5793	0.002777	1.901e-06	-0.787617
NM_126351	AT2G02990	ribonuclease 1 (RNS1)	264.3	0.5805	0.004443	3.305e-06	-0.784632
NM_124923	AT5G55410	Bifunctional inhibitor/lipid-transfer protein/seed storage 2S albumin superfamily protein	353.6	0.585	0.01201	1e-05	-0.773491
NM_118753	AT4G26200	1-amino-cyclopropane-1-carboxylate synthase 7 (ACS7)	425	0.5886	0.02022	1.985e-05	-0.764641
NM_105661	AT1G69930	glutathione S-transferase TAU 11 (GSTU11)	629.6	0.5902	0.05559	8.27e-05	-0.760724
NM_148726	AT3G15356	Legume lectin family protein	572	0.6006	0.04481	5.866e-05	-0.735524
NM_112540	AT3G16670	Pollen Ole e 1 allergen and extensin family protein	345	0.6013	0.01135	9.119e-06	-0.733843
NM_118757	AT4G26240	histone-lysine N-methyltransferase	292.7	0.6125	0.006322	4.891e-06	-0.707218
NM_119743	AT4G35770	Senescence 1 (SEN1, DIN1)	601.3	0.617	0.04912	7.015e-05	-0.696658
AK228686	N/A	N/A	405.3	0.622	0.01866	1.666e-05	-0.685014
NM_101698	AT1G18400	BR enhanced expression 1 (BEE1)	534.9	0.6392	0.04183	4.605e-05	-0.645661
NM_001203290	AT5G03860	malate synthase (MLS)	416.5	0.6399	0.01935	1.842e-05	-0.644082
NM_001085330	AT5G65080	AGAMOUS-like 68 (AGL68, MAF5)	400.4	0.6424	0.01844	1.591e-05	-0.638456
NM_121050	AT5G10120	Ethylene insensitive 3 family protein	521.3	0.6428	0.04029	4.196e-05	-0.637558
NM_179134	AT4G28520	cruciferin 3 (CRU3)	739.3	0.6438	0.08456	0.0001459	-0.635316
NM_180427	AT5G03545	expressed in response to phosphate starvation protein	619.6	0.6441	0.05356	7.809e-05	-0.634643
TA29648_3702	N/A	N/A	718.9	0.6495	0.08084	0.0001323	-0.622599
NM_118751	N/A	N/A	408.6	0.6514	0.01861	1.716e-05	-0.618384
NM_123275	AT5G39130	RmlC-like cupins superfamily protein	523.5	0.6533	0.03976	4.259e-05	-0.614182
NM_114908	AT3G50480	homolog of RPW8 4 (HR4)	557.1	0.6566	0.04371	5.332e-05	-0.606913
NM_104360	AT1G54870	NAD(P)-binding Rossmann-fold superfamily protein	568	0.6579	0.04469	5.718e-05	-0.60406
NM_111399	AT3G05260	NAD(P)-binding Rossmann-fold superfamily protein	517.3	0.6641	0.04032	4.079e-05	-0.590528
NM_125808	AT5G64120	Peroxidase superfamily protein	537.7	0.6644	0.0415	4.692e-05	-0.589876
NM_125159	AT5G57760	hypothetical protein	693.5	0.667	0.07529	0.0001165	-0.584241
AK319042	N/A	N/A	764.1	0.667	0.09023	0.0001638	-0.584241
NM_100430	AT1G05510	naphthalene 1,2-dioxygenase subunit alpha (DUF1264)	717.2	0.6683	0.08166	0.0001312	-0.581432
NM_118760	AT4G26270	phosphofructokinase 3 (PFK3)	591.1	0.6732	0.04822	6.6e-05	-0.570893
NM_105752	AT1G70840	MLP-like protein 31 (MLP31)	599.9	0.6766	0.04976	6.959e-05	-0.563625
